# Supplementary material
Source: MDPI journal article supplement (https://www.mdpi.com/2072-4292/15/21/5210)
Supplement: s1 [file s1]

## Supplementary Materials for

### Enhanced Impact of Land Reclamation on the Tide in the Guangxi Beibu Gulf

Jingfang Lu 1, Yibo Zhang 1, Runchen Cao 1, Xianqing Lv 1, Minjie Xu 2,\*, Guandong Gao 3,4,5 and Qiang Liu 6

1 Frontier Science Center for Deep Ocean Multispheres and Earth System (FDOMES) and Physical

Oceanography Laboratory, Ocean University of China, Qingdao 266100, China;

lujingfang@stu.ouc.edu.cn (J.L.); zhangyibo9300@stu.ouc.edu.cn (Y.Z.);

caoruichen@stu.ouc.edu.cn (R.C.); xqinglv@ouc.edu.cn (X.L.)

2 Ocean School, Yantai University, Yantai 264005, China

3 CAS Key Laboratory of Ocean Circulation and Waves, Institute of Oceanology Chinese Academy of Sciences, Qingdao 266071, China; guandonggao@qdio.ac.cn

4 Function Laboratory for Ocean Dynamics and Climate, Qingdao National Laboratory for Marine Science Technology, Qingdao 266237, China

5 Center for Mega-Science, Chinese Academy of Sciences, Qingdao, 26607, China

6 College of Engineering, Ocean University of China, Qingdao 266100, China;

liuqiang@ouc.edu.cn

\* Correspondence: minjiexu@ytu.edu.cn

Supplementary Material includes the following:

Evaluation index system of the driving force factors of the reclamation (**Table S1**); Related index data of Guangxi Beibu Gulf (**Table S2**); And the numerical scheme of forward equations and adjoint equations

Table S1. Evaluation index system of the driving force factors of the reclamation

| First-grade indicators        | Second-grade indicators      | Definition                                                                                                                                                                             |
|-------------------------------|------------------------------|----------------------------------------------------------------------------------------------------------------------------------------------------------------------------------------|
| 1.Economic development        | 1. GDP of primary industry   | the end result of agricultural economic activities (including farming, forestry, animal husbandry and fishery).                                                                        |
|                               | 2. GDP of secondary industry | the end result of industrial economic activities (including mining and quarrying, manufacturing, electricity, gas and water production and supply).                                    |
| 2.Population growth           | 3. Population growth rate    | to the rate of population growth caused by natural and migration changes over a given time period (usually within a year).                                                             |
|                               | 4. Urbanization degree       | the urban population as a percentage of total population.                                                                                                                              |
| 3.Marine industry development | 5. Mariculture production    | the output of aquatic products whose young are artificially released or naturally collected, and raised and managed artificially, and which are caught form the waters of mariculture. |
|                               | 6. Cargo throughput          | the weight of the cargo being loaded and unloaded.                                                                                                                                     |

Table S2. Related index data of Guangxi Beibu Gulf

| year | GDP of primary industry(100 million yuan) | GDP of secondary industry(100 million yuan) | urbanization degree(%) | population growth rate(‰) | mariculture production(1000 tons) | cargo throughput of major port(10000 tons) | coastal reclamation area (km <sup>2</sup> ) | reclamation area in each year (km <sup>2</sup> ) | Natural coastline (km) | Artificial coastline (km) | Total coastline length (km) |
|------|-------------------------------------------|---------------------------------------------|------------------------|---------------------------|-----------------------------------|--------------------------------------------|---------------------------------------------|--------------------------------------------------|------------------------|---------------------------|-----------------------------|
|------|-------------------------------------------|---------------------------------------------|------------------------|---------------------------|-----------------------------------|--------------------------------------------|---------------------------------------------|--------------------------------------------------|------------------------|---------------------------|-----------------------------|

|      |       |        |      |      |      |       |      |      |       |       |        |
|------|-------|--------|------|------|------|-------|------|------|-------|-------|--------|
| 1997 | 53.5  | 37.3   | 21.8 | 5.1  | 498  | 938   | 0    | 0    | 765.7 | 195.1 | 960.8  |
| 1998 | 67.2  | 47.8   | 22.6 | 4.94 | 573  | 1071  | 1.4  | 1.4  | 741.3 | 225   | 966.3  |
| 1999 | 59.3  | 36     | 24.1 | 6.21 | 665  | 1163  | 5.4  | 4    | 713.4 | 255.3 | 968.7  |
| 2000 | 61    | 39     | 28.1 | 6.3  | 706  | 1288  | 5.6  | 0.2  | 692   | 279.4 | 971.4  |
| 2001 | 105.7 | 63.5   | 28.2 | 7.05 | 751  | 1442  | 9.7  | 4.1  | 655.8 | 320   | 975.8  |
| 2002 | 109   | 73.7   | 28.3 | 7.2  | 801  | 2049  | 11.1 | 1.4  | 653.5 | 334.3 | 987.8  |
| 2003 | 128   | 104    | 29.1 | 7.29 | 799  | 2016  | 13.6 | 2.5  | 636.7 | 351.9 | 988.6  |
| 2004 | 136.7 | 128.5  | 31.7 | 7.7  | 858  | 2400  | 13.4 | 0    | 614.2 | 390   | 1004.2 |
| 2005 | 149.1 | 157.3  | 33.6 | 8.16 | 929  | 2678  | 15.1 | 1.7  | 583   | 414.7 | 997.7  |
| 2006 | 160   | 220.3  | 34.6 | 8.32 | 801  | 4949  | 24.4 | 9.3  | 580.6 | 427.1 | 1007.7 |
| 2007 | 189.3 | 280.9  | 36.2 | 8.2  | 763  | 7192  | 32.6 | 8.2  | 555.1 | 434.8 | 989.9  |
| 2008 | 215.7 | 391.2  | 38.1 | 8.7  | 871  | 9408  | 36.5 | 3.9  | 523.1 | 461.8 | 984.9  |
| 2009 | 231   | 384.7  | 39.2 | 8.65 | 877  | 11923 | 56.6 | 20.1 | 509.9 | 483.7 | 993.6  |
| 2010 | 266.8 | 546.2  | 38.1 | 7.9  | 723  | 15331 | 69.2 | 12.6 | 507.4 | 550.6 | 1058   |
| 2011 | 329.2 | 715.7  | 39.8 | 7.93 | 977  | 17438 | 72.6 | 3.4  | 499.3 | 553.8 | 1053.1 |
| 2012 | 355.3 | 826.5  | 41.9 | 8.02 | 1056 | 18675 | 75.3 | 2.7  | 474.2 | 571.2 | 1045.4 |
| 2013 | 393   | 986.7  | 44.1 | 8.2  | 1090 | 20189 | 80.7 | 5.4  | 467.5 | 596.9 | 1064.4 |
| 2014 | 416   | 1133.8 | 45.1 | 8.37 | 1189 | 20482 | 83.8 | 3.1  | 467.3 | 610.1 | 1077.4 |
| 2015 | 448.8 | 1230   | 45.0 | 8.15 | 1185 | 22031 | 88   | 4.2  | 465.9 | 617.6 | 1083.5 |
| 2016 | 439.3 | 1384   | 45.9 | 7.87 | 1214 | 20392 | 94.5 | 6.5  | 462.4 | 631   | 1093.4 |
| 2017 | 514.7 | 1714.9 | 47.2 | 8.9  | 1308 | 23554 | 98.6 | 4.1  | 461.1 | 638.4 | 1099.5 |

### Numerical scheme of forward equations (S1)

$$\begin{aligned} & \frac{\zeta_{m,n}^{2j+1} - \zeta_{m,n}^{2j}}{\Delta t} + \frac{(h_{m+\frac{1}{2},n} + \zeta_{m+\frac{1}{2},n}^{2j})u_{m,n}^{2j} - (h_{m-\frac{1}{2},n} + \zeta_{m-\frac{1}{2},n}^{2j})u_{m-1,n}^{2j}}{a_n \Delta \lambda} \\ & + \frac{(h_{m,n+\frac{1}{2}} + \zeta_{m,n+\frac{1}{2}}^{2j})v_{m,n}^{2j} \cos(\varphi_{n+\frac{1}{2}}) - (h_{m,n-\frac{1}{2}} + \zeta_{m,n-\frac{1}{2}}^{2j})v_{m,n-1}^{2j} \cos(\varphi_{n-\frac{1}{2}})}{a_n \Delta \varphi} = 0, \end{aligned} \quad (S1.1)$$

$$\begin{aligned} & \frac{v_{m,n}^{2j+1} - v_{m,n}^{2j}}{\Delta t} + \frac{\bar{u}_{m,n}^{2j} (v_{m+1,n}^{2j} - v_{m-1,n}^{2j})}{2a_n \Delta \lambda} + \frac{v_{m,n}^{2j} (v_{m,n+1}^{2j} - v_{m,n-1}^{2j})}{2R \Delta \varphi} + f_n \bar{u}_{m,n}^{2j} \\ & + \frac{k_{m,n+\frac{1}{2}} s_{m,n}^{2j} [\alpha v_{m,n}^{2j+1} + (1-\alpha)v_{m,n}^{2j}]}{h_{m,n+\frac{1}{2}} + \zeta_{m,n+\frac{1}{2}}^{2j}} + \frac{g(\zeta_{m,n+1}^{2j+1} - \zeta_{m,n}^{2j+1})}{R \Delta \varphi} - \frac{g(\bar{\zeta}_{m,n+1}^{2j+1} - \bar{\zeta}_{m,n}^{2j+1})}{R \Delta \varphi} \\ & - A \Delta v_{m,n}^{2j} + \frac{\bar{u}_{m,n}^{2j} \tan(\varphi_n)}{R} = 0, \end{aligned} \quad (S1.2)$$

$$\begin{aligned} & \frac{u_{m,n}^{2j+1} - u_{m,n}^{2j}}{\Delta t} + \frac{u_{m,n}^{2j} (u_{m+1,n}^{2j} - u_{m-1,n}^{2j})}{2a_n \Delta \lambda} + \frac{\bar{v}_{m,n}^{2j+1} (u_{m,n+1}^{2j} - u_{m,n-1}^{2j})}{2R \Delta \varphi} - f_n \bar{v}_{m,n}^{2j+1} \\ & + \frac{k_{m+\frac{1}{2},n} r_{m,n}^{2j} [\alpha u_{m,n}^{2j+1} + (1-\alpha)u_{m,n}^{2j}]}{h_{m+\frac{1}{2},n} + \zeta_{m+\frac{1}{2},n}^{2j}} + \frac{g(\zeta_{m+1,n}^{2j+1} - \zeta_{m,n}^{2j+1})}{a_n \Delta \lambda} - \frac{g(\bar{\zeta}_{m+1,n}^{2j+1} - \bar{\zeta}_{m,n}^{2j+1})}{a_n \Delta \lambda} \\ & - A \Delta u_{m,n}^{2j} - \frac{u_{m,n}^{2j} \bar{v}_{m,n}^{2j+1} \tan(\varphi_n)}{R} = 0, \end{aligned} \quad (S1.3)$$

$$\begin{aligned} & \frac{\zeta_{m,n}^{2j+2} - \zeta_{m,n}^{2j+1}}{\Delta t} + \frac{(h_{m+\frac{1}{2},n} + \zeta_{m+\frac{1}{2},n}^{2j+1})u_{m,n}^{2j+1} - (h_{m-\frac{1}{2},n} + \zeta_{m-\frac{1}{2},n}^{2j+1})u_{m-1,n}^{2j+1}}{a_n \Delta \lambda} \\ & + \frac{(h_{m,n+\frac{1}{2}} + \zeta_{m,n+\frac{1}{2}}^{2j+1})v_{m,n}^{2j+1} \cos(\varphi_{n+\frac{1}{2}}) - (h_{m,n-\frac{1}{2}} + \zeta_{m,n-\frac{1}{2}}^{2j+1})v_{m,n-1}^{2j+1} \cos(\varphi_{n-\frac{1}{2}})}{R \Delta \varphi} = 0, \end{aligned} \quad (S1.4)$$

$$\begin{aligned} & \frac{u_{m,n}^{2j+2} - u_{m,n}^{2j+1}}{\Delta t} + \frac{u_{m,n}^{2j+1} (u_{m+1,n}^{2j+1} - u_{m-1,n}^{2j+1})}{2a_n \Delta \lambda} + \frac{\bar{v}_{m,n}^{2j+1} (u_{m,n+1}^{2j+1} - u_{m,n-1}^{2j+1})}{2R \Delta \varphi} - f_n \bar{v}_{m,n}^{2j+1} \\ & + \frac{k_{m+\frac{1}{2},n} r_{m,n}^{2j+1} [\alpha u_{m,n}^{2j+2} + (1-\alpha)u_{m,n}^{2j+1}]}{h_{m+\frac{1}{2},n} + \zeta_{m+\frac{1}{2},n}^{2j+1}} + \frac{g(\zeta_{m+1,n}^{2j+2} - \zeta_{m,n}^{2j+2})}{a_n \Delta \lambda} - \frac{g(\bar{\zeta}_{m+1,n}^{2j+2} - \bar{\zeta}_{m,n}^{2j+2})}{a_n \Delta \lambda} \\ & - A \Delta u_{m,n}^{2j+1} - \frac{u_{m,n}^{2j+1} \bar{v}_{m,n}^{2j+1} \tan(\varphi_n)}{R} = 0. \end{aligned} \quad (S1.5)$$

$$\begin{aligned}
& \frac{v_{m,n}^{2j+2} - v_{m,n}^{2j+1}}{\Delta t} + \frac{\bar{u}_{m,n}^{2j+2} (v_{m+1,n}^{2j+1} - v_{m-1,n}^{2j+1})}{2a_n \Delta \lambda} + \frac{v_{m,n}^{2j+1} (v_{m,n+1}^{2j+1} - v_{m,n-1}^{2j+1})}{2R \Delta \phi} + f_n \bar{u}_{m,n}^{2j+2} \\
& + \frac{k_{m,n+\frac{1}{2}} s_{m,n}^{2j+1} [\alpha v_{m,n}^{2j+2} + (1-\alpha) v_{m,n}^{2j+1}]}{h_{m,n+\frac{1}{2}} + \zeta_{m,n+\frac{1}{2}}^{2j+1}} + \frac{g(\zeta_{m,n+1}^{2j+2} - \zeta_{m,n}^{2j+2})}{R \Delta \phi} - \frac{g(\bar{\zeta}_{m,n+1}^{2j+2} - \bar{\zeta}_{m,n}^{2j+2})}{R \Delta \phi} \\
& - A \Delta v_{m,n}^{2j+1} + \frac{\bar{u}_{m,n}^{2j+2} \tan(\phi_n)}{R} = 0.
\end{aligned} \tag{S1.6}$$

where  $\Delta \lambda, \Delta \phi, \Delta t$  represent the longitude, the latitude and the time step respectively,

$\phi_n = \phi_0 + (n-1)\Delta \phi$ ,  $\phi_0$  is the initial latitude,  $a_n = R \cos(\phi_n)$ ,  $\bar{u}_{m,n}^j$ ,  $r_{m,n}^j$ ,  $\bar{v}_{m,n}^j$ ,  $s_{m,n}^j$  are the same with Lardner (1993a).

**Adjoint equations:** In order to construct the adjoint equations, the cost function is defined as:

$$J(\zeta) = \frac{1}{2} K_\zeta \int_\Sigma (\zeta - \hat{\zeta})^2 d\sigma,$$

and the Lagrangian function is defined as

$$\begin{aligned}
L = \int & \left[ \mu \left( \frac{\partial u}{\partial t} + \frac{u}{a} \frac{\partial u}{\partial \lambda} + \frac{v}{R} \frac{\partial u}{\partial \phi} - \frac{uv \tan \phi}{R} - f v + \frac{ku \sqrt{u^2 + v^2}}{h + \zeta} - A \Delta u + \frac{g}{a} \frac{\partial(\zeta - \bar{\zeta})}{\partial \lambda} \right) + \right. \\
& v \left( \frac{\partial v}{\partial t} + \frac{u}{a} \frac{\partial v}{\partial \lambda} + \frac{v}{R} \frac{\partial v}{\partial \phi} + \frac{u^2 \tan \phi}{R} + f u + \frac{kv \sqrt{u^2 + v^2}}{h + \zeta} - A \Delta v + \frac{g}{R} \frac{\partial(\zeta - \bar{\zeta})}{\partial \phi} \right) + \\
& \left. \tau \left( \frac{\partial \zeta}{\partial t} + \frac{1}{a} \frac{\partial[(h + \zeta)u]}{\partial \lambda} + \frac{1}{a} \frac{\partial[(h + \zeta)v \cos \phi]}{\partial \phi} \right) + \frac{1}{2} W(\zeta - \hat{\zeta})^2 \right] dS + J(\zeta),
\end{aligned}$$

Similar with the method of He et al. (2004), the adjoint equations can be obtained as

$$\begin{aligned}
& \frac{\partial \tau}{\partial t} + \frac{u}{a} \frac{\partial \tau}{\partial \lambda} + \frac{v}{a} \frac{\partial (\tau \cos \varphi)}{\partial \varphi} + \frac{k \mu u \sqrt{u^2 + v^2}}{(h + \zeta)^2} + \frac{k v v \sqrt{u^2 + v^2}}{(h + \zeta)^2} + \frac{g}{a} \frac{\partial \mu}{\partial \lambda} + \frac{g}{a} \frac{\partial v}{\partial \varphi} = K_\zeta (\zeta - \hat{\zeta}), \\
& \frac{\partial \mu}{\partial t} - \left( f + \frac{k u v}{(h + \zeta) \sqrt{u^2 + v^2}} \right) v - \frac{\mu}{a} \frac{\partial u}{\partial \lambda} - \frac{v}{a} \frac{\partial v}{\partial \lambda} + \frac{1}{a} \frac{\partial}{\partial \lambda} (\mu u) + \frac{1}{R} \frac{\partial}{\partial \varphi} (\mu v) \\
& \quad + \frac{h + \zeta}{a} \frac{\partial \tau}{\partial \lambda} + A \Delta \mu - \frac{k(2u^2 + v^2)}{(h + \zeta) \sqrt{u^2 + v^2}} \mu + \frac{\mu v \tan \varphi}{R} - \frac{2 v u \tan \varphi}{R} = 0, \\
& \frac{\partial v}{\partial t} + \left( f - \frac{k u v}{(h + \zeta) \sqrt{u^2 + v^2}} \right) \mu - \frac{\mu}{R} \frac{\partial u}{\partial \varphi} - \frac{v}{R} \frac{\partial v}{\partial \varphi} + \frac{1}{a} \frac{\partial}{\partial \lambda} (v u) + \frac{1}{R} \frac{\partial}{\partial \varphi} (v v) \\
& \quad + \frac{h + \zeta}{a} \frac{\partial (\tau \cos \varphi)}{\partial \varphi} + A \Delta v - \frac{k(u^2 + 2v^2)}{(h + \zeta) \sqrt{u^2 + v^2}} v + \frac{\mu u \tan \varphi}{R} = 0.
\end{aligned} \tag{S2}$$

where  $\tau, \mu, v$  denote the adjoint variables of  $\zeta, u, v$ , respectively. For the adjoint equations (S2), the numerical scheme is given as S2.

### Numerical scheme of adjoint equations (S2)

$$\begin{aligned}
& \frac{\tau_{m,n}^{2j+2} - \tau_{m,n}^{2j+1}}{\Delta t} + \frac{(u_{m,n}^{2j+1} + u_{m-1,n}^{2j+1})(\tau_{m+1,n}^{2j+2} - \tau_{m-1,n}^{2j+2})}{2a_n \Delta \lambda} \\
& \quad + \frac{(v_{m,n}^{2j+1} + v_{m,n-1}^{2j+1})[\tau_{m,n+1}^{2j+2} \cos(\varphi_{n+\frac{1}{2}}) - \tau_{m,n-1}^{2j+2} \cos(\varphi_{n-\frac{1}{2}})]}{2a_n \Delta \varphi} \\
& \quad + \frac{k_{m+\frac{1}{2},n} \mu_{m,n}^{2j+2} u_{m,n}^{2j+1} \sqrt{u_{m,n}^{2j+12} + v_{m,n}^{2j+12}}}{(h_{m+\frac{1}{2},n} + \zeta_{m+\frac{1}{2},n}^{2j+1})^2} + \frac{k_{m,n+\frac{1}{2}} v_{m,n}^{2j+2} v_{m,n}^{2j+1} \sqrt{u_{m,n}^{2j+12} + v_{m,n}^{2j+12}}}{(h_{m,n+\frac{1}{2}} + \zeta_{m,n+\frac{1}{2}}^{2j+1})^2} \\
& \quad + \frac{g(\mu_{m,n}^{2j+2} - \mu_{m-1,n}^{2j+2})}{a_n \Delta \lambda} + \frac{g(v_{m,n}^{2j+2} - v_{m,n-1}^{2j+2})}{a_n \Delta \varphi} - K_\zeta D_{m,n} (\zeta_{m,n}^{2j+1} - \hat{\zeta}_{m,n}^{2j+1}) = 0,
\end{aligned} \tag{S2.1}$$

$$\begin{aligned}
& \frac{v_{m,n}^{2j+2} - v_{m,n}^{2j+1}}{\Delta t} + (f_n - c_{m,n}^{2j+1}) \bar{\mu}_{m,n}^{2j+2} - e_{m,n}^{2j+1} [(1 - \alpha) v_{m,n}^{2j+1} + \alpha v_{m,n}^{2j+2}] \\
& \quad + \frac{(h_{m,n-\frac{1}{2}} + \zeta_{m,n-\frac{1}{2}}^{2j+1})[\tau_{m,n}^{2j+1} \cos(\varphi_n) - \tau_{m,n-1}^{2j+1} \cos(\varphi_{n-1})]}{a_n \Delta \varphi} \\
& \quad - \frac{\mu_{m,n}^{2j+2} (u_{m,n+1}^{2j+1} - u_{m,n-1}^{2j+1})}{2R \Delta \varphi} - \frac{v_{m,n}^{2j+2} (v_{m,n+1}^{2j+1} - v_{m,n-1}^{2j+1})}{2R \Delta \varphi} \\
& \quad + \frac{v_{m+1,n}^{2j+2} u_{m+1,n}^{2j+1} - v_{m-1,n}^{2j+2} u_{m-1,n}^{2j+1}}{2a_n \Delta \lambda} + \frac{v_{m,n+1}^{2j+2} v_{m,n+1}^{2j+1} - v_{m,n-1}^{2j+2} v_{m,n-1}^{2j+1}}{2R \Delta \varphi} \\
& \quad + A \Delta v_{m,n}^{2j+2} + \frac{u_{m,n}^{2j+1} \mu_{m,n}^{2j+2} \tan(\varphi_n)}{R} = 0,
\end{aligned} \tag{S2.2}$$

$$\begin{aligned}
& \frac{\mu_{m,n}^{2j+2} - \mu_{m,n}^{2j+1}}{\Delta t} - (f_n + b_{m,n}^{2j+1}) \bar{v}_{m,n}^{2j+1} - d_{m,n}^{2j+1} [(1-\alpha)\mu_{m,n}^{2j+1} + \alpha\mu_{m,n}^{2j+2}] \\
& + \frac{(h_{m-\frac{1}{2},n} + \zeta_{m-\frac{1}{2},n}^{2j+1})(\tau_{m,n}^{2j+1} - \tau_{m-1,n}^{2j+1})}{a_n \Delta \lambda} \\
& - \frac{\mu_{m,n}^{2j+2}(u_{m+1,n}^{2j+1} - u_{m-1,n}^{2j+1})}{2a_n \Delta \lambda} - \frac{v_{m,n}^{2j+1}(v_{m+1,n}^{2j+1} - v_{m-1,n}^{2j+1})}{2a_n \Delta \lambda} \\
& + \frac{\mu_{m+1,n}^{2j+2} u_{m+1,n}^{2j+1} - \mu_{m-1,n}^{2j+2} u_{m-1,n}^{2j+1}}{2a_n \Delta \lambda} + \frac{\mu_{m,n+1}^{2j+2} v_{m,n+1}^{2j+1} - \mu_{m,n-1}^{2j+2} v_{m,n-1}^{2j+1}}{2R \Delta \phi} \\
& + A \Delta \mu_{m,n}^{2j+2} + \frac{\mu_{m,n}^{2j+2} v_{m,n}^{2j+1} \tan(\varphi_n) - 2v_{m,n}^{2j+1} u_{m,n}^{2j+1} \tan(\varphi_n)}{R} = 0,
\end{aligned} \tag{S2.3}$$

$$\begin{aligned}
& \frac{\tau_{m,n}^{2j+1} - \tau_{m,n}^{2j}}{\Delta t} + \frac{(u_{m,n}^{2j} + u_{m-1,n}^{2j})(\tau_{m,n}^{2j+1} - \tau_{m-1,n}^{2j+1})}{2a_n \Delta \lambda} \\
& + \frac{(v_{m,n}^{2j} + v_{m,n-1}^{2j})[\tau_{m,n+1}^{2j+1} \cos(\varphi_{n+\frac{1}{2}}) - \tau_{m,n-1}^{2j+1} \cos(\varphi_{n-\frac{1}{2}})]}{2a_n \Delta \phi} \\
& + \frac{k_{m+\frac{1}{2},n} \mu_{m,n}^{2j+1} u_{m,n}^{2j} \sqrt{u_{m,n}^{2j\ 2} + \bar{v}_{m,n}^{2j\ 2}}}{(h_{m+\frac{1}{2},n} + \zeta_{m+\frac{1}{2},n}^{2j})^2} + \frac{k_{m,n+\frac{1}{2}} v_{m,n}^{2j+1} v_{m,n}^{2j} \sqrt{u_{m,n}^{2j\ 2} + v_{m,n}^{2j\ 2}}}{(h_{m,n+\frac{1}{2}} + \zeta_{m,n+\frac{1}{2}}^{2j})^2} \\
& + \frac{g(\mu_{m,n}^{2j+1} - \mu_{m-1,n}^{2j+1})}{a_n \Delta \lambda} + \frac{g(v_{m,n}^{2j+1} - v_{m,n-1}^{2j+1})}{a_n \Delta \phi} - K_\zeta D_{m,n}(\zeta_{m,n}^{2j} - \hat{\zeta}_{m,n}^{2j}) = 0,
\end{aligned} \tag{S2.4}$$

$$\begin{aligned}
& \frac{\mu_{m,n}^{2j+1} - \mu_{m,n}^{2j}}{\Delta t} - (f_n + b_{m,n}^{2j}) \bar{v}_{m,n}^{2j+1} - d_{m,n}^{2j} [(1-\alpha)\mu_{m,n}^{2j} + \alpha\mu_{m,n}^{2j+1}] \\
& + \frac{(h_{m-\frac{1}{2},n} + \zeta_{m-\frac{1}{2},n}^{2j})(\tau_{m,n}^{2j} - \tau_{m-1,n}^{2j})}{a_n \Delta \lambda} \\
& - \frac{\mu_{m,n}^{2j+1}(u_{m+1,n}^{2j} - u_{m-1,n}^{2j})}{2a_n \Delta \lambda} - \frac{v_{m,n}^{2j+1}(v_{m+1,n}^{2j} - v_{m-1,n}^{2j})}{2a_n \Delta \lambda} \\
& + \frac{\mu_{m+1,n}^{2j+1} u_{m+1,n}^{2j} - \mu_{m-1,n}^{2j+1} u_{m-1,n}^{2j}}{2a_n \Delta \lambda} + \frac{v_{m,n+1}^{2j+1} v_{m,n+1}^{2j} - v_{m,n-1}^{2j+1} v_{m,n-1}^{2j}}{2R \Delta \phi} \\
& + A \Delta \mu_{m,n}^{2j+1} + \frac{\mu_{m,n}^{2j+1} v_{m,n}^{2j} \tan(\varphi_n) - 2v_{m,n}^{2j+1} u_{m,n}^{2j} \tan(\varphi_n)}{R} = 0,
\end{aligned} \tag{S2.5}$$

$$\begin{aligned}
& \frac{v_{m,n}^{2j+1} - v_{m,n}^{2j}}{\Delta t} + (f_n - c_{m,n}^{2j}) \bar{\mu}_{m,n}^{2j} - e_{m,n}^{2j} [(1 - \alpha) v_{m,n}^{2j} + \alpha v_{m,n}^{2j+1}] \\
& + \frac{(h_{m,n-\frac{1}{2}} + \zeta_{m,n-\frac{1}{2}}^{2j}) [\tau_{m,n}^{2j} \cos(\varphi_n) - \tau_{m,n-1}^{2j} \cos(\varphi_{n-1})]}{a_n \Delta \varphi} \\
& - \frac{\mu_{m,n}^{2j} (u_{m,n+1}^{2j} - u_{m,n-1}^{2j})}{2R \Delta \varphi} - \frac{v_{m,n}^{2j+1} (v_{m,n+1}^{2j} - v_{m,n-1}^{2j})}{2R \Delta \varphi} \\
& + \frac{v_{m+1,n}^{2j+1} u_{m+1,n}^{2j} - v_{m-1,n}^{2j+1} u_{m-1,n}^{2j}}{2a_n \Delta \lambda} + \frac{v_{m,n+1}^{2j+1} v_{m,n+1}^{2j} - v_{m,n-1}^{2j+1} v_{m,n-1}^{2j}}{2R \Delta \varphi} \\
& + A \Delta v_{m,n}^{2j+1} + \frac{u_{m,n}^{2j} \mu_{m,n}^{2j} \tan(\varphi_n)}{R} = 0.
\end{aligned} \tag{S2.6}$$

where  $\bar{\mu}_{m,n}^j, \bar{v}_{m,n}^j$  are similar to  $\bar{u}_{m,n}^j, \bar{v}_{m,n}^j$ , and

$$b_{m,n}^j = \frac{k_{m+\frac{1}{2},n}}{h_{m+\frac{1}{2},n} + \zeta_{m+\frac{1}{2},n}^j} \frac{u_{m,n}^j \bar{v}_{m,n}^j}{\sqrt{u_{m,n}^{j^2} + \bar{v}_{m,n}^{j^2}}}, \quad c_{m,n}^j = \frac{k_{m,n+\frac{1}{2}}}{h_{m,n+\frac{1}{2}} + \zeta_{m,n+\frac{1}{2}}^j} \frac{\bar{u}_{m,n}^j v_{m,n}^j}{\sqrt{\bar{u}_{m,n}^{j^2} + v_{m,n}^{j^2}}}$$
